# Supplementary material for: Altered Urinary Metabolomics in Hereditary Angioedema
Source: MDPI journal article supplement (doi:10.3390/metabo12111140), 2022-11-19
Supplement: s1 [file s1]

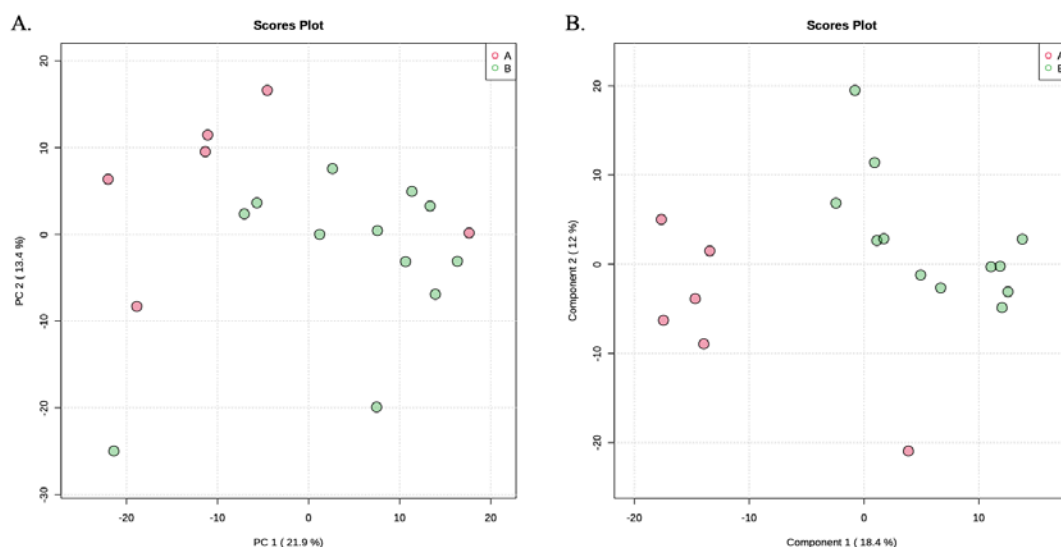

**Figure S1.** (A) Unsupervised PCA score plot of HAE caused by a missense or in-frame mutation (Group A) and HAE caused by a premature stop codon mutation (Group B); (B) Supervised PLS-DA score plot of HAE caused by a missense or in-frame mutation (Group A) and HAE caused by a premature stop codon mutation (Group B).

**Table S1. Molecular weights, Q1 m/z values, and adduct forms of metabolites**

| Metabolite                                       | Molecular Weight | Q1 m/z  | Adduct form |
|--------------------------------------------------|------------------|---------|-------------|
| Quinone                                          | 108.09           | 109     | M+H         |
| N-Methylhydantoin                                | 114.1            | 113     | M-H         |
| 2-Aminooctanoic acid                             | 159.226          | 160     | M+H         |
| 2,6-Dimethoxybenzoic acid                        | 182.17           | 183     | M+H         |
| Thymine                                          | 126.113          | 127.1   | M+H         |
| Propionylcholine                                 | 160.234          | 160     | M+H         |
| 1-Methylxanthine                                 | 166.14           | 167.1   | M+H         |
| D-Glyceraldehyde 3-phosphate                     | 170.058          | 169.05  | M-H         |
| O-Acetyl-L-carnitine                             | 203.236          | 204.1   | M+H         |
| Hypoxanthine                                     | 136.11           | 137     | M+H         |
| Acetylcarnitine                                  | 203.236          | 203.9   | M+H         |
| Trehalose 6-phosphate                            | 422.276          | 421.076 | M-H         |
| 1,4-Dihydro-1-Methyl-4-Oxo-3-Pyridinecarboxamide | 152.151          | 153.06  | M+H         |
| 2,4-Dihydroxybenzoic Acid                        | 154.12           | 153     | M-H         |
| L-Octanoylcarnitine                              | 287.395          | 288.3   | M+H         |
| Oxypurinol                                       | 152.11           | 153.04  | M+H         |
| DL-Citrulline                                    | 175.19           | 176.09  | M+H         |
| Carnitine-C8                                     | 287.3            | 288.3   | M+H         |
| Xanthine                                         | 152.11           | 151     | M-H         |

|                                                   |         |         |      |
|---------------------------------------------------|---------|---------|------|
| L-Alanine                                         | 89.09   | 90      | M+H  |
| Adrenochrome                                      | 179.17  | 178.058 | M-H  |
| Hippuric acid                                     | 179.17  | 178.05  | M-H  |
| Taurochenodeoxycholic acid                        | 499.7   | 498.2   | M-H  |
| D-3-Phenyllactic acid                             | 166.17  | 165     | M-H  |
| Glucarate O-Phosphoric Acid                       | 290.12  | 289.1   | M-H  |
| Vitamin B2                                        | 376.364 | 377.15  | M+H  |
| Hexanoylcarnitine                                 | 259.34  | 260.1   | M+H  |
| L-Homocystine                                     | 268.354 | 267.05  | M-H  |
| Carnitine-C6                                      | 259.3   | 260.2   | M+H  |
| Decanoylcarnitine                                 | 315.4   | 316.4   | M+H  |
| Dodecanoylcarnitine                               | 343.501 | 344.4   | M+H  |
| Carnitine-C12                                     | 343.5   | 344.3   | M+H  |
| Isovalerylcarnitine                               | 245.32  | 246.3   | M+H  |
| 5-Aminosalicylate                                 | 153.135 | 154.05  | M+H  |
| Carnitine-C3                                      | 217.26  | 218.1   | M+H  |
| Carnitine-C5                                      | 245.32  | 246.1   | M+H  |
| Hydrocortisone                                    | 362.46  | 363.22  | M+H  |
| 2-Methylbutyroylcarnitine                         | 245.315 | 246.16  | M+H  |
| cholate                                           | 408.58  | 407.3   | M-H  |
| N-Propionylglycine                                | 131.13  | 130.05  | M-H  |
| 3-Oxo-7alpha,12alpha-hydroxy-5beta-cholanoic acid | 406.562 | 405.2   | M-H  |
| Cinnamoylglycine                                  | 205.21  | 204.07  | M-H  |
| O-Acetyl-L-homoserine                             | 161.16  | 162.1   | M+H  |
| L-Carnitine                                       | 161.2   | 162.1   | M+H  |
| Propionyl-L-carnitine                             | 217.26  | 218.14  | M+H  |
| L-Alanyl-L-Lysine                                 | 217.265 | 218.1   | M+H  |
| Cortisone                                         | 360.44  | 361.112 | M+H  |
| Methylmalonate                                    | 118.09  | 117     | M-H  |
| 3-Hydroxy-3-Methylpentane-1,5-Dioic Acid          | 162.14  | 163     | M+H  |
| DL-Norepinephrine                                 | 169.18  | 337.14  | 2M-H |
| Succinic acid                                     | 176.13  | 175.04  | M-H  |
| Nonanoic acid                                     | 158.24  | 159.1   | M+H  |
| 3-OH-anthranilate                                 | 153.14  | 154     | M+H  |
| Deoxyguanosine                                    | 267.241 | 266.09  | M-H  |
| Uric Acid                                         | 168.11  | 167     | M-H  |
| Pantetheine                                       | 278.13  | 277.13  | M-H  |
| guanethidine                                      | 198.31  | 199.2   | M+H  |
| D-Glucosamine 6-phosphate                         | 259.151 | 258.04  | M-H  |
| Indoxylsulfuric acid                              | 213.21  | 212.01  | M-H  |
| CMPF                                              | 240.252 | 239.1   | M-H  |
| Hydroquinone                                      | 110.111 | 109.04  | M-H  |

|                                     |         |         |     |
|-------------------------------------|---------|---------|-----|
| p-cresol                            | 108.14  | 107.058 | M-H |
| 3-Hydroxy-butyryl carnitine         | 247.29  | 248.3   | M+H |
| Isocitrate                          | 192.12  | 191.027 | M-H |
| Tauroursodeoxycholic acid Dihydrate | 499.7   | 498.2   | M-H |
| 4-Aminobenzoate                     | 137.136 | 137.3   | M+H |
| Tauro-alpha-Muricholic acid         | 515.7   | 514.2   | M-H |
| Taurocholic acid                    | 515.7   | 514.2   | M-H |
| Furfural                            | 96.08   | 97.021  | M+H |
| O-Anisic Acid                       | 152.147 | 153.05  | M+H |
| Biotin                              | 244.31  | 245     | M+H |
| L-Glutamine O-Hexside               | 308.288 | 307     | M-H |
| Pyridoxamine                        | 168.193 | 168.9   | M+H |

---
